# Supplementary material for: Review article: Melt-Affected Ice Cores for (Sub-)Polar Research in a Warming World
Source: Copernicus journal article supplement (doi:10.5194/egusphere-2023-1939), 2023-09-27
Supplement: Supplementary file 1 [file egusphere-2023-1939-supplement.pdf]

**Supplementary Table 1:** Three example calculations of melt frequency and melt feature percentage in an exemplary 50-cm annual layer. Though the total thickness of melt layers is equal in A and B, melt frequency differs, and despite A and C exhibiting the same melt frequency, the melt feature percentage varies. These example results show how the two approaches highlight different aspects of melt intensity within a profile, i.e. melt frequency and thickness-derived melt-affected mass.

| Example Profile | Number of melt layers in 50-cm annual layer | Total thickness of melt layers (cm) | Melt frequency ( $a^{-1}$ ) | Melt feature percentage (%) |
|-----------------|---------------------------------------------|-------------------------------------|-----------------------------|-----------------------------|
| A               | 3                                           | 5                                   | <b>3</b>                    | <b>10</b>                   |
| B               | 1                                           | 5                                   | <b>1</b>                    | <b>10</b>                   |
| C               | 3                                           | 2                                   | <b>3</b>                    | <b>4</b>                    |
